# Supplementary material for: Nanorod-assembled NiCo2O4 hollow microspheres assisted by an ionic liquid as advanced electrode materials for supercapacitors
Source: Royal Society of Chemistry journal article supplement (doi:10.1039/c7ra00067g), 2017-01-01
Supplement: c7ra00067g1.pdf [file c7ra00067g1.pdf]

## Electronic Supplementary Information (ESI)

### Nanorod-assembled NiCo<sub>2</sub>O<sub>4</sub> hollow microspheres assisted by ionic liquid as advanced electrode materials for supercapacitors

Yirong Zhu,<sup>a,b</sup> Xiaobo Ji,<sup>c</sup> Ruiming Yin,<sup>b</sup> Zhongliang Hu,<sup>b</sup> Xiaoqing Qiu,<sup>c</sup> Zhibin Wu<sup>c</sup> and Yong Liu<sup>\*a</sup>

<sup>a</sup>State Key Lab of Powder Metallurgy, Central South University, Changsha, 410083, China. E-mail: yonliu@csu.edu.cn

<sup>b</sup>College of Metallurgy and Material Engineering, Hunan University of Technology, Zhuzhou, 412007, China. E-mail: zhuyirong2004@163.com

<sup>c</sup>College of Chemistry and Chemical Engineering, Central South University, Changsha, 410083, China. E-mail: xji@csu.edu.cn

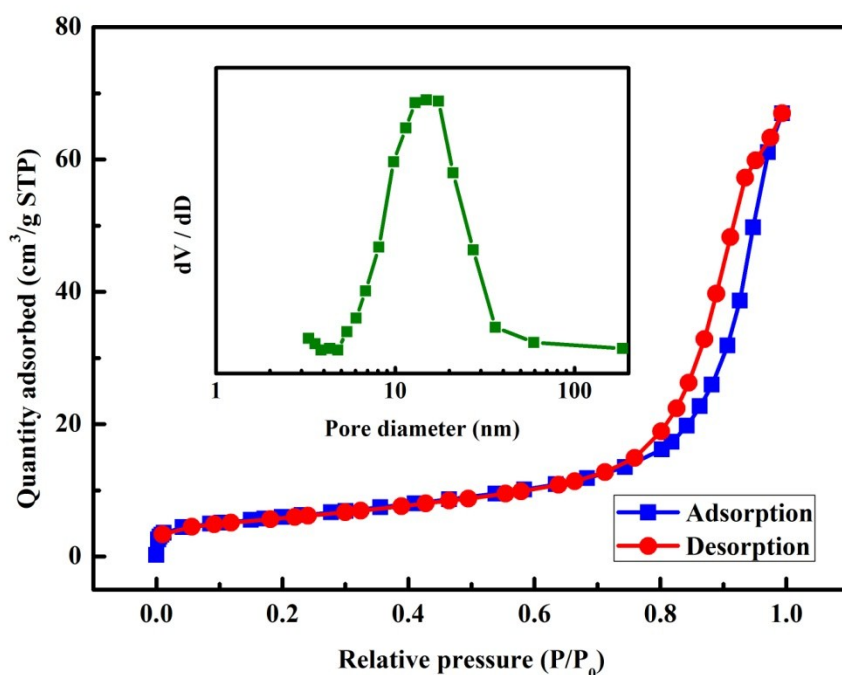

**Fig. S1** Nitrogen adsorption and desorption isotherm of the NiCo<sub>2</sub>O<sub>4</sub> hollow microsphere and the inset shows the corresponding BJH pore size distribution curve.
